# Supplementary material for: Quantitative analysis of resveratrol derivatives in the seed coats of tree peonies and their hypoglycemic activities in vitro/vivo
Source: Royal Society of Chemistry journal article supplement (doi:10.1039/d1fo03412j), 2021-12-14
Supplement: d1fo03412j1.pdf [file d1fo03412j1.pdf]

**Quantitative analysis of resveratrol derivatives in seed coats of tree peonies and their hypoglycemic activities  
in *vitro/vivo***

Weidong Wang<sup>a</sup>, Zenggen Liu<sup>a\*</sup>, Fan Kong<sup>b</sup>, Lixia He<sup>c</sup>, Linghao Fang<sup>d</sup>, Qingyan Shu<sup>b\*</sup>

<sup>a</sup> Qinghai Provincial Key Laboratory of Tibetan Medicine Research and Key Laboratory of Tibetan Medicine Research, Northwest Institute of Plateau Biology, CAS, Xining 810001, China

<sup>b</sup> Key Laboratory of Plant Resources and Beijing Botanical Garden, Institute of Botany, CAS, Beijing 100093, China

<sup>c</sup> Forestry Sci-tech Extension Station of Gansu Province, Lanzhou 730046, China

<sup>d</sup> Ruilaiyin (Beijing) Biotechnology Co., Ltd, Beijing 100094, China

---

\* Corresponding authors. Tel/Fax: +86 971 6143282, E-mail address: lzg@nwipb.ac.cn (ZG Liu), shuqy@ibcas.ac.cn (QY Shu). Addresses for other authors: wangweidong315@mails.ucas.ac.cn (WD Wang), kongfankfkf@163.com (F Kong), 2205352850@qq.com (LX He), cocozm13811669708@126.com (LH Fang).

**Table S1** Phytochemical composition and content (mg/g) in seed coats of tree peonies.

| Species               | RD         | PF        | SA         | SB           | VF         | VT        | AD           |
|-----------------------|------------|-----------|------------|--------------|------------|-----------|--------------|
| <i>P. ostii</i>       | 0.20±0.07  | 0.55±0.23 | 18.52±2.17 | 184.29±22.71 | 39.25±3.54 | 1.38±0.29 | 176.64±15.80 |
| <i>P. ludlowii</i>    | 12.84±1.14 | 0.09±0.05 | 0.03±0.01  | 0.10±0.04    | 0.91±0.25  | 1.44±0.68 | 142.21±10.97 |
| <i>P. delavayi</i>    | 8.11±1.20  | 0.05±0.01 | 6.55±0.84  | 33.27±2.76   | 11.52±1.05 | 0.85±0.10 | 98.60±8.72   |
| <i>P. rockii</i>      | 0.56±0.11  | 1.24±0.42 | 27.27±2.16 | 145.62±19.58 | 1.01±0.29  | 0.16±0.08 | 31.66±2.50   |
| <i>P. qiui</i>        | 0.09±0.02  | 0.24±0.07 | 12.04±1.36 | 69.64±8.95   | 3.57±1.17  | 0.19±0.05 | 19.06±3.18   |
| <i>P. decomposita</i> | 0.02±0.01  | 0.92±0.30 | 10.67±1.37 | 54.30±7.28   | 0.57±0.22  | 0.02±0.00 | 2.19±0.55    |
| <i>P. potaninii</i>   | 0.26±0.08  | 0.65±0.22 | 8.58±2.55  | 50.03±7.20   | 0.34±0.11  | 0.23±0.10 | 34.38±3.66   |
| <i>P. lutea</i>       | 2.14±0.43  | 0.51±0.24 | 3.15±0.82  | 15.31±3.31   | 0.21±0.06  | 0.20±0.08 | 28.65±4.59   |

RD: (E)-resveratrol 3,5-O- $\beta$ -diglucoside, PF: paeoniflorin, SA: suffruticosol A, SB: suffruticosol B, VF: trans- $\epsilon$ -viniferin, VT: vateriferol, AD: ampelopsin D.

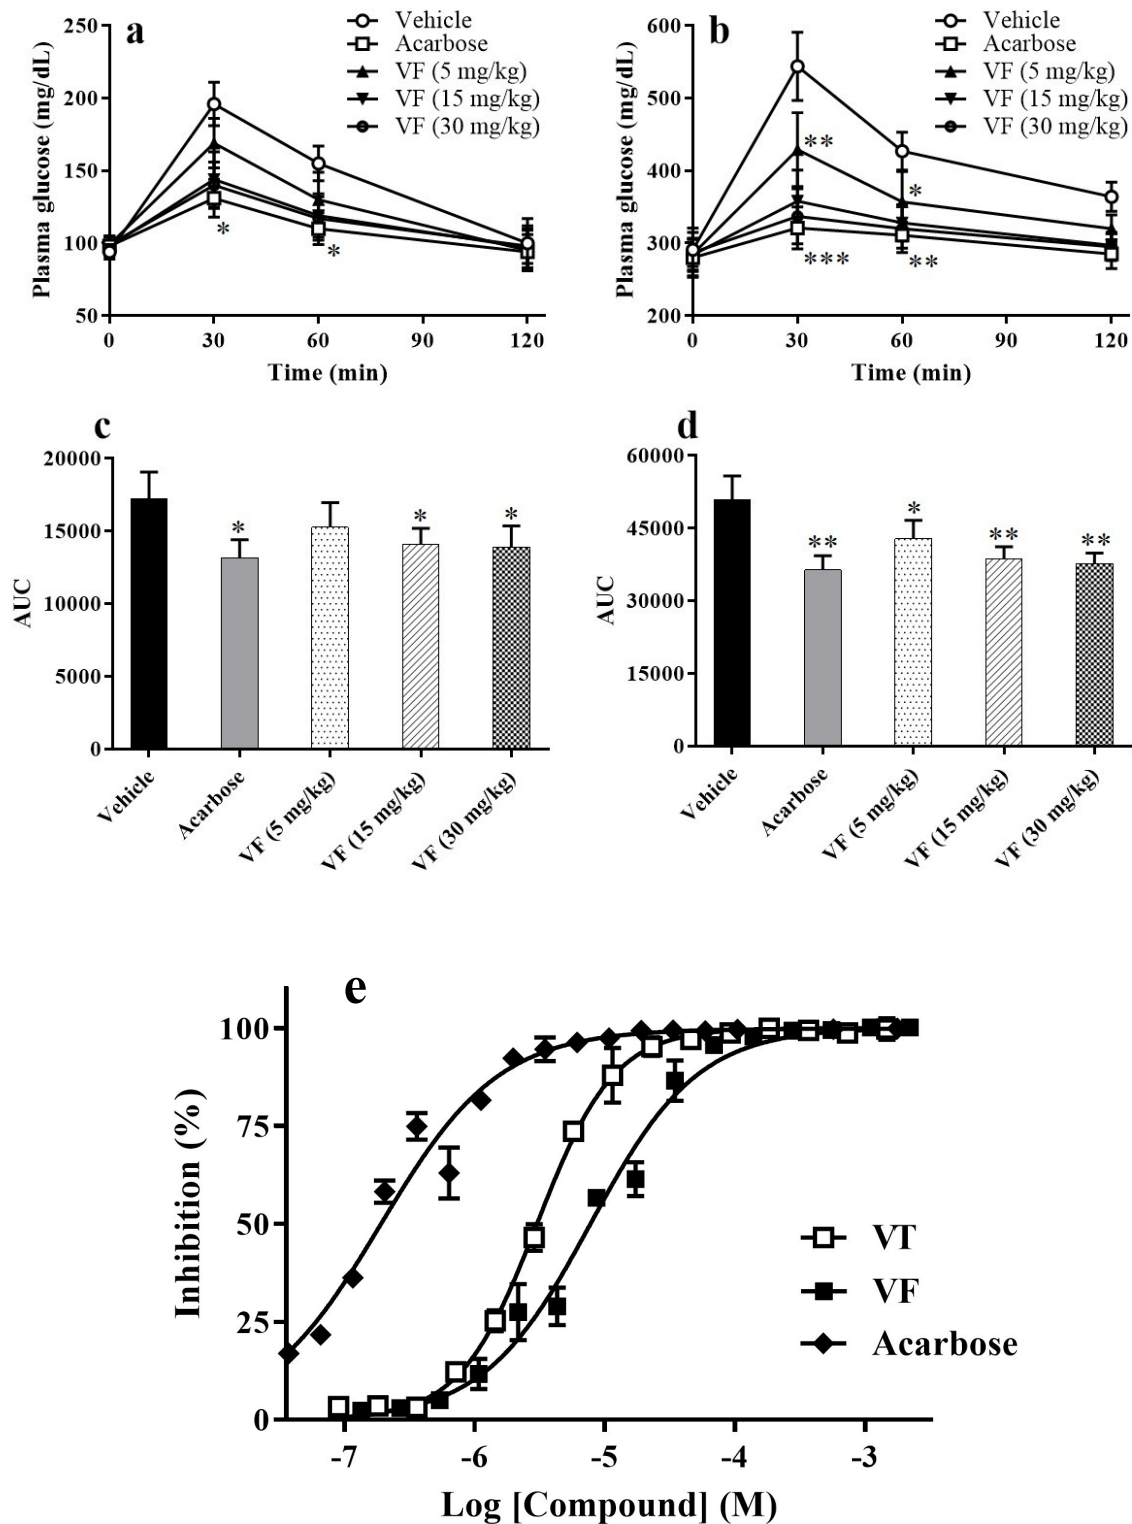

**Figure S1.** PBG-lowering effect of acarbose and different doses of trans- $\epsilon$ -viniferin (VF) in starch-loaded normal mice (a and c) and diabetic mice (b and d). The data exhibit the mean  $\pm$  SEM ( $n = 9$ ; \*,  $P < 0.05$ , \*\*,  $P < 0.01$ , and \*\*\*,  $P < 0.001$ , compared to the vehicle group). And  $\alpha$ -glucosidase inhibition effects of VT, VF and acarbose at different concentrations were fitted with a logistic function to count the  $IC_{50}$  value (e).

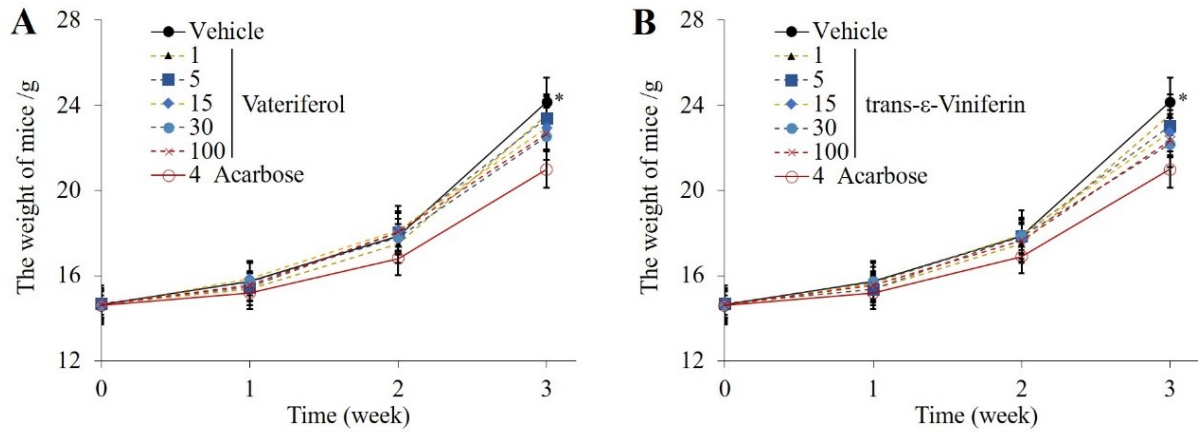

**Figure S2.** Effects of vateriferol (A) and trans- $\epsilon$ -viniferin (B) on the body weight of mice. Mice were randomly divided into 7 groups (7/group), and the body weight of the mice was measured once a week. The doses of the two compounds were 1, 5, 15, 30, and 100 mg/kg. Data were expressed as mean  $\pm$  SEM ( $n = 7$ /group). Statistical analysis: two-way repeated measures ANOVA, followed by Holm-Sidak multiple comparison test. Vehicle (0.9% saline) and acarbose (4 mg/kg) groups were designated as negative and positive control group, respectively. Difference in body weight between vehicle and acarbose groups at week 3 was statistically significant ( $*P < 0.05$ ).

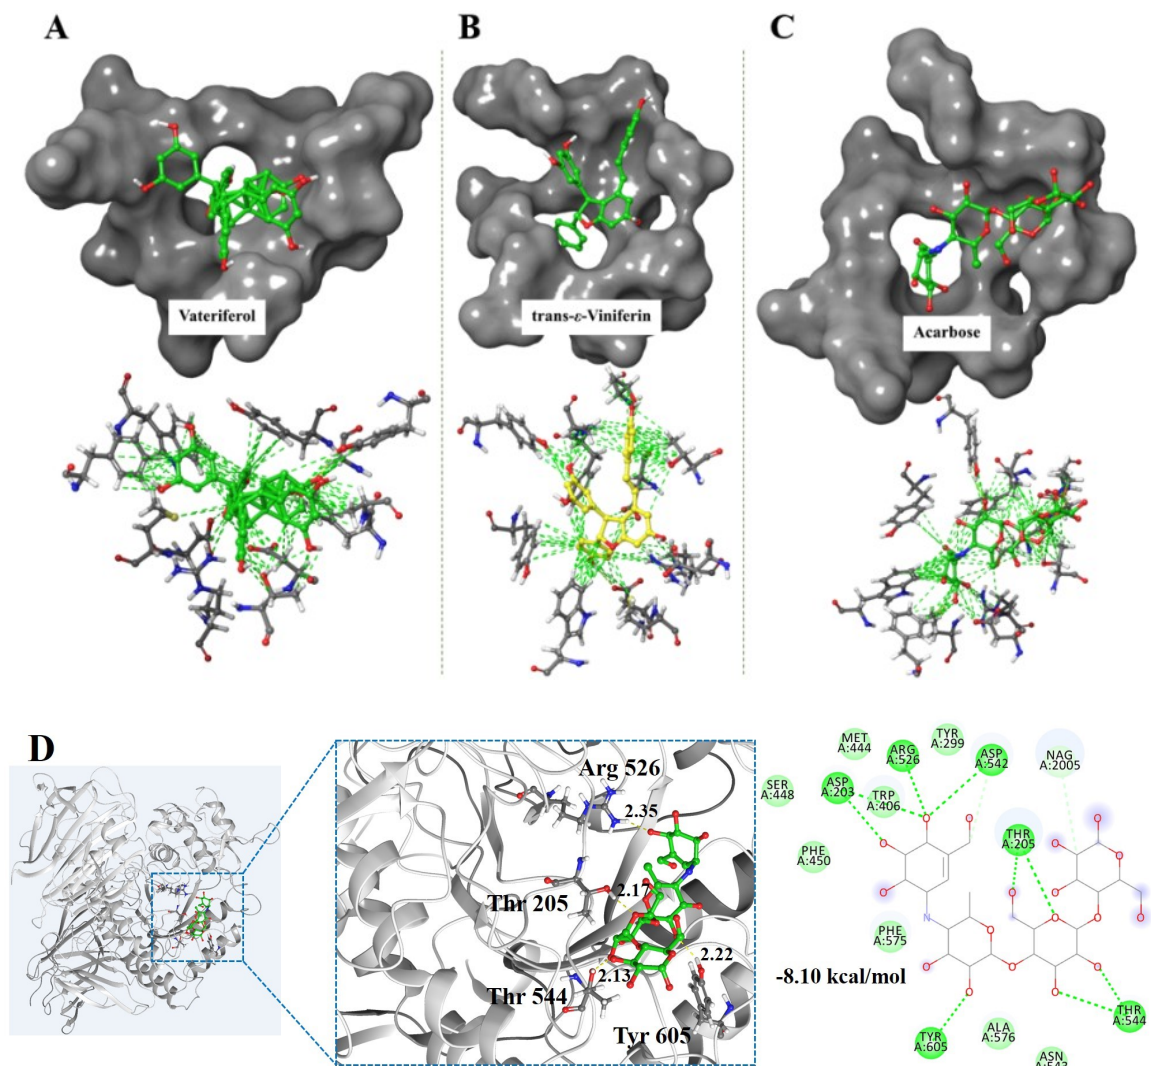

**Figure S3.** Molecular docking of vateriferol (A), trans- $\epsilon$ -viniferin (B) and acarbose (C and D) in the region of the active site of the protein (PDB: 2QMJ).

## Supplementary data

The NMR spectra of the phytochemicals (**1-7**) isolated from *POSC* are as follows.

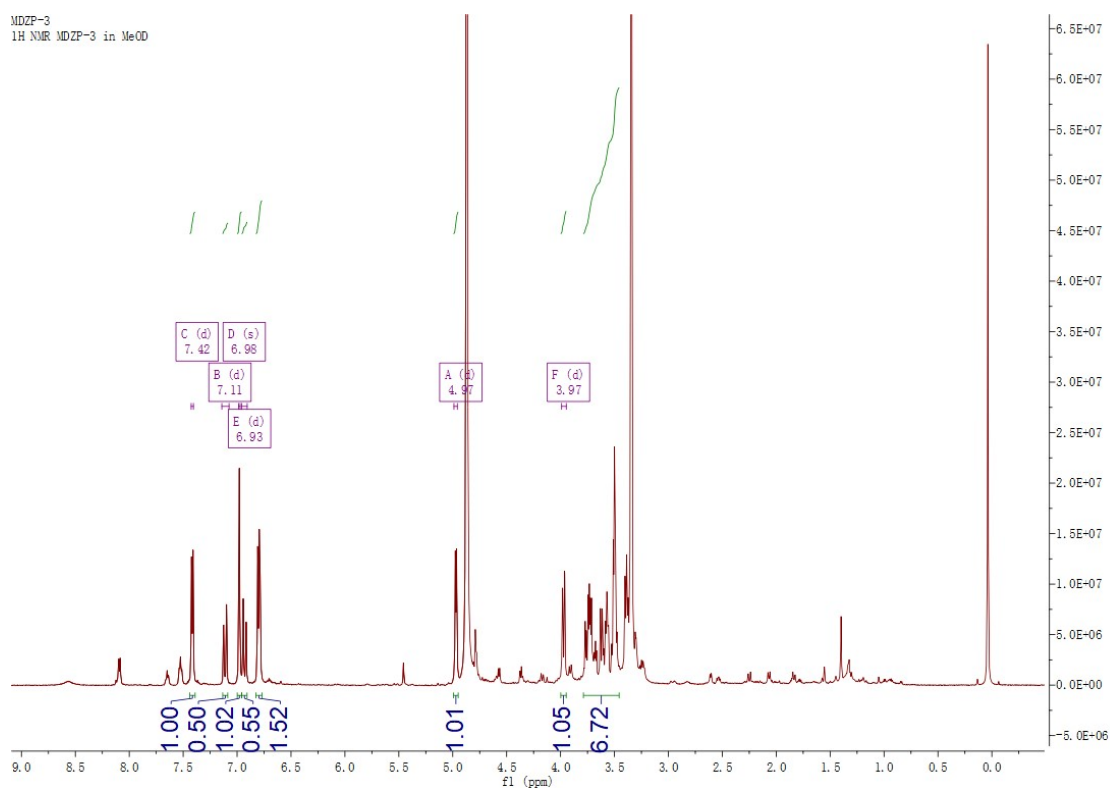

The  $^1\text{H}$  NMR (600 MHz, MeOD) spectrum of **1**

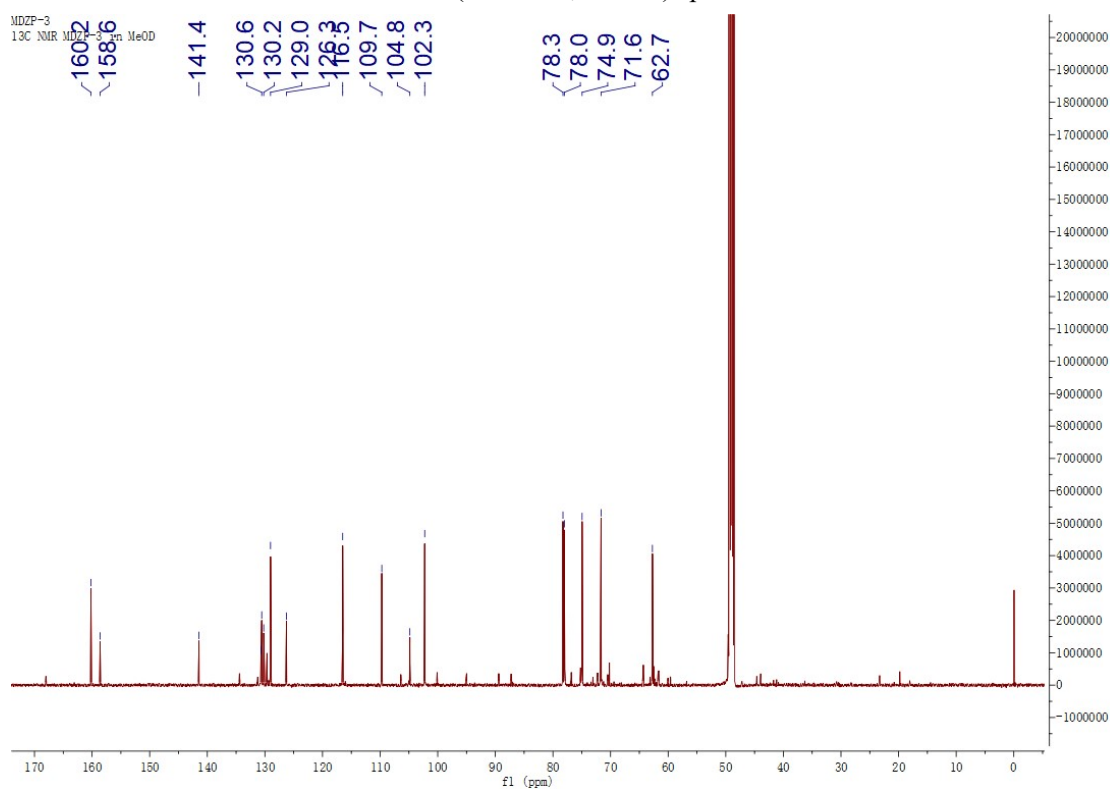

The  $^{13}\text{C}$  NMR (151 MHz, MeOD) spectrum of **1**

MDZF-2  
<sup>1</sup>H NMR MDZF-2 in MeOD

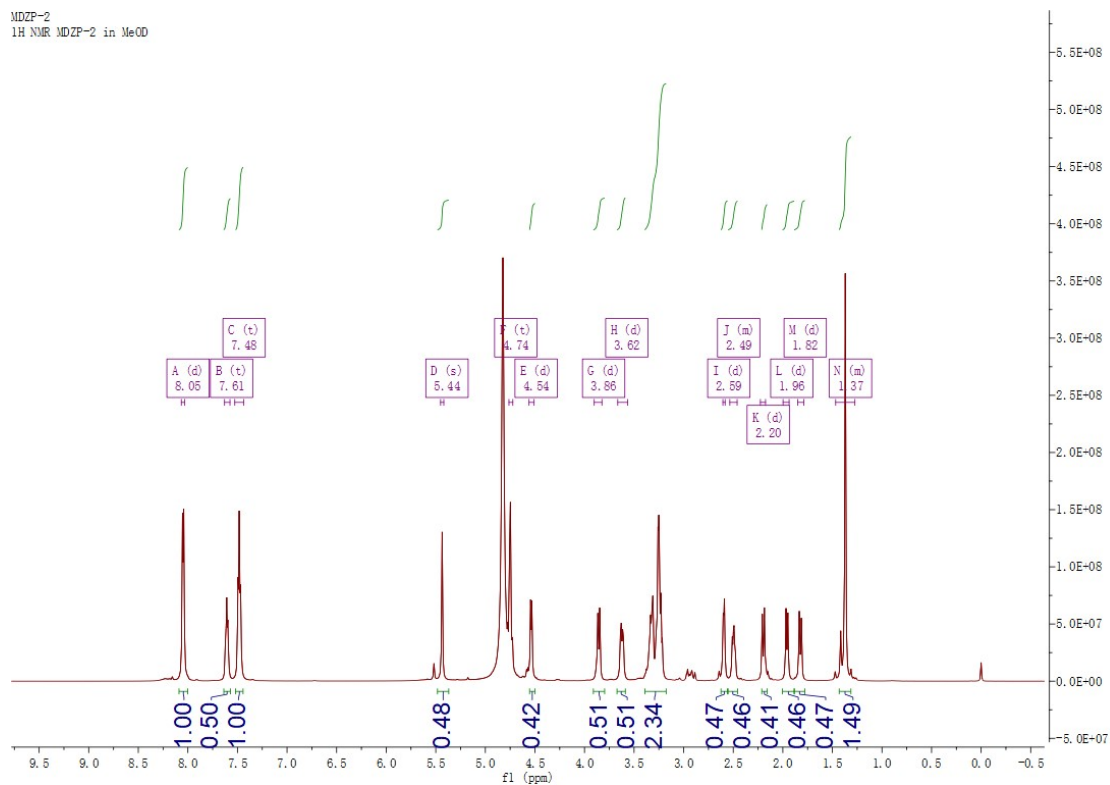

The <sup>1</sup>H NMR (600 MHz, MeOD) spectrum of **2**

MDZF-2  
<sup>13</sup>C NMR MDZF-2 in MeOD

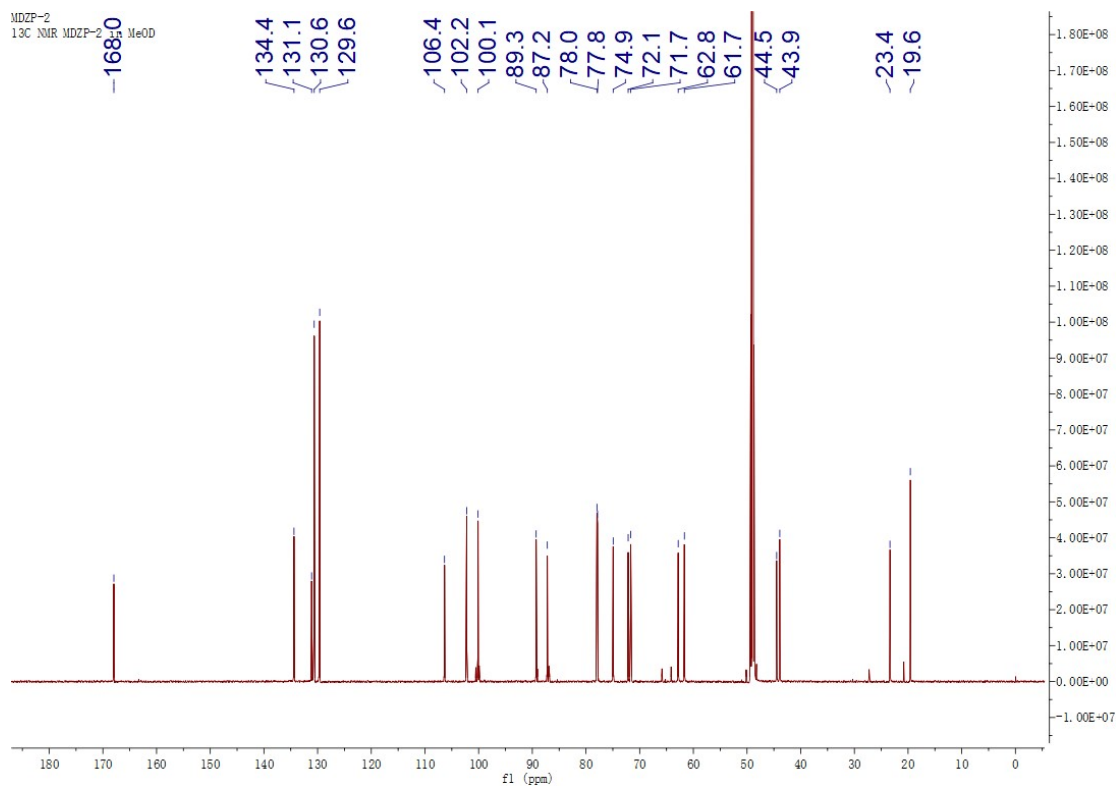

The <sup>13</sup>C NMR (151 MHz, MeOD) spectrum of **2**

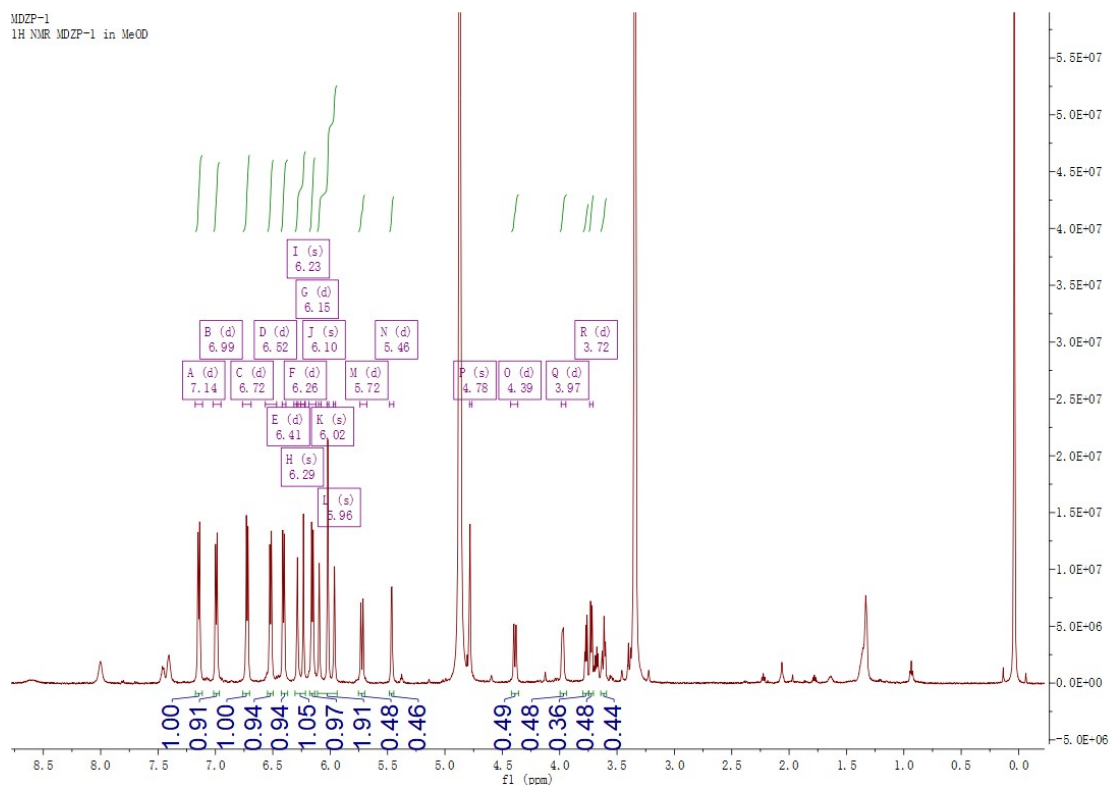

The <sup>1</sup>H NMR (600 MHz, MeOD) spectrum of **3**

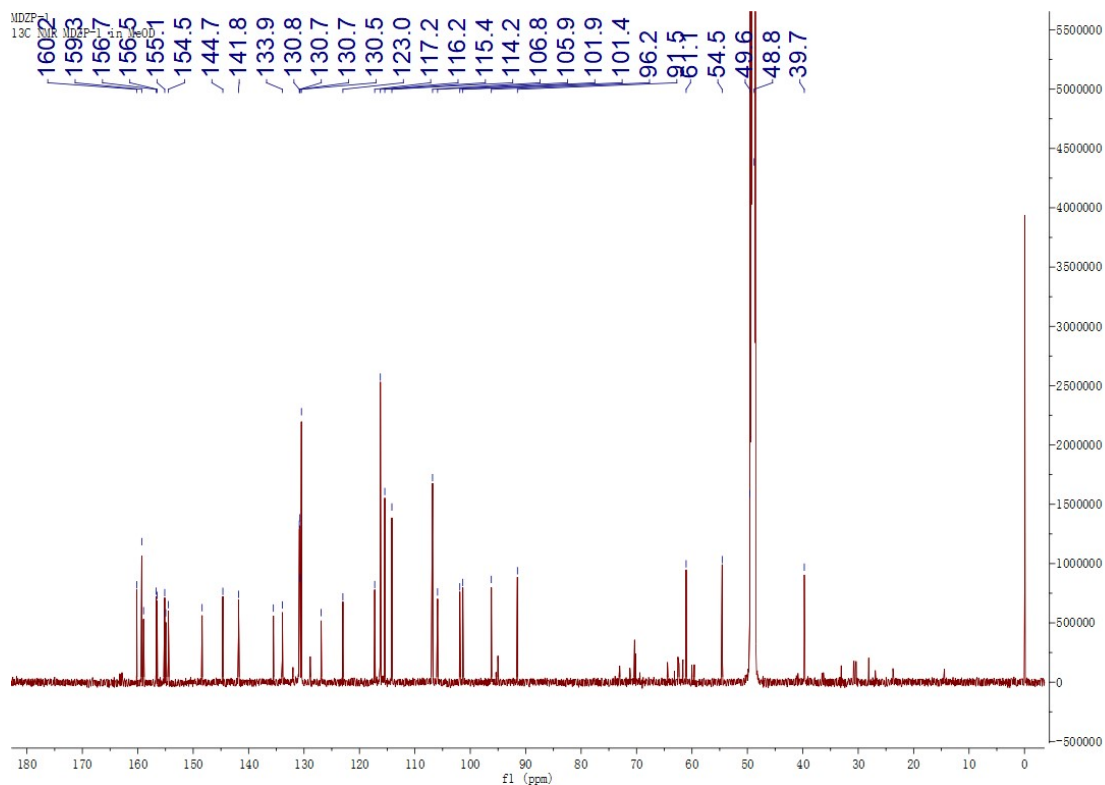

The <sup>13</sup>C NMR (151 MHz, MeOD) spectrum of **3**



MDZF-5  
<sup>1</sup>H NMR MDZF-5 in MeOD

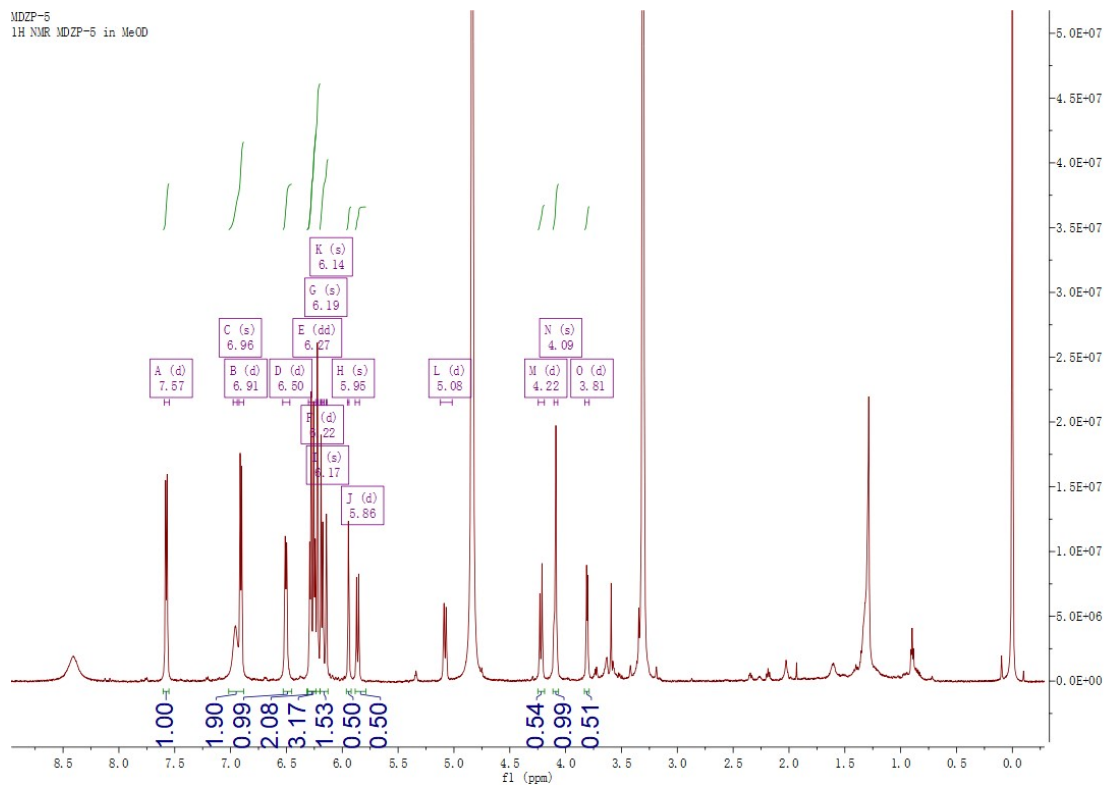

The <sup>1</sup>H NMR (600 MHz, MeOD) spectrum of **4**

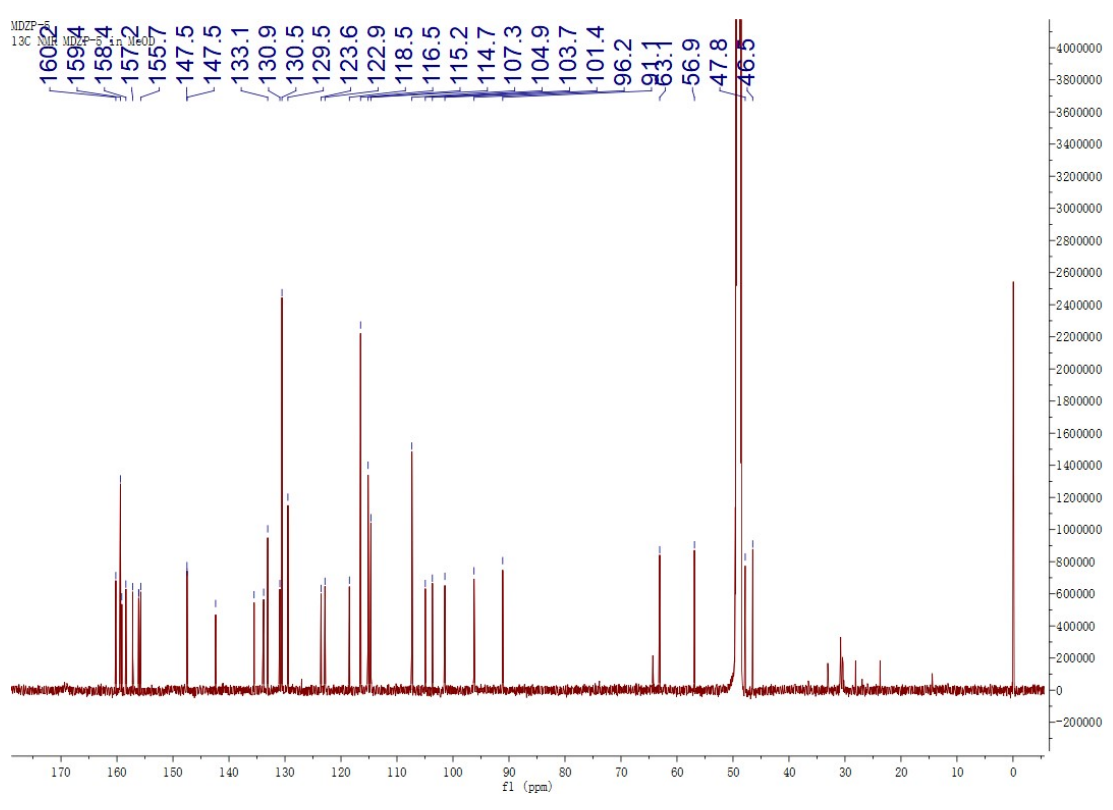

The <sup>13</sup>C NMR (151 MHz, MeOD) spectrum of **4**

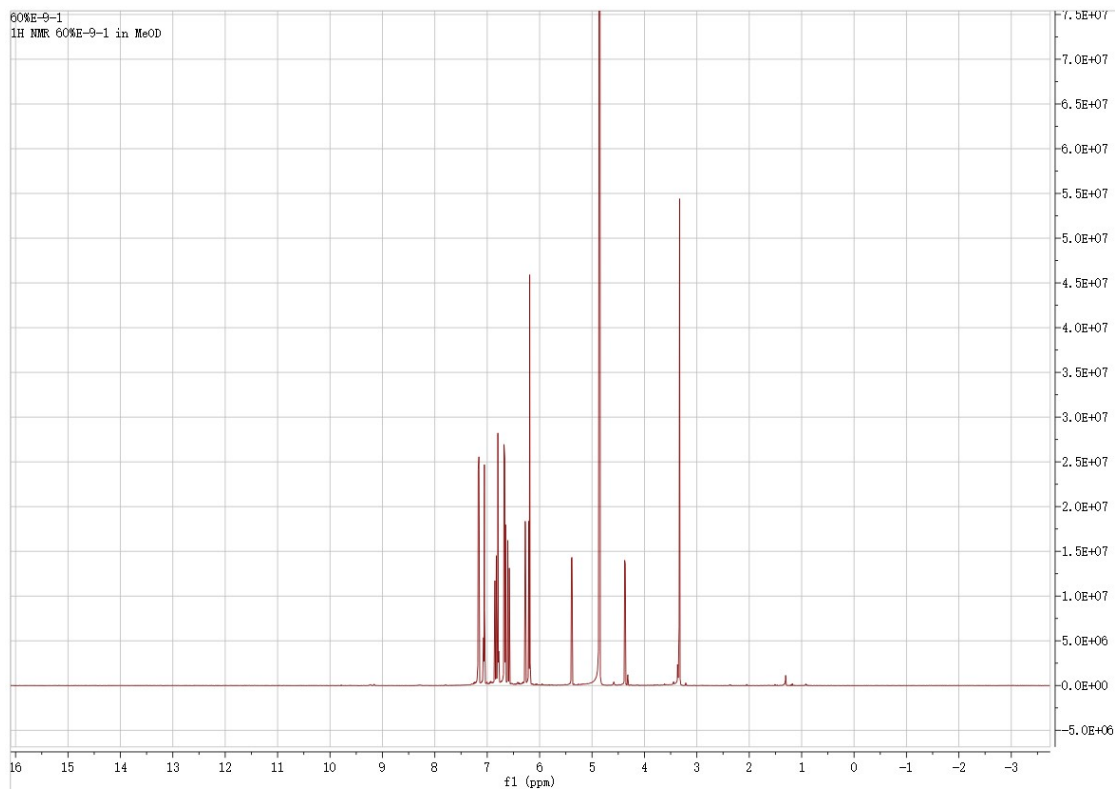

The  $^1\text{H}$  NMR (600 MHz, MeOD) spectrum of **5**

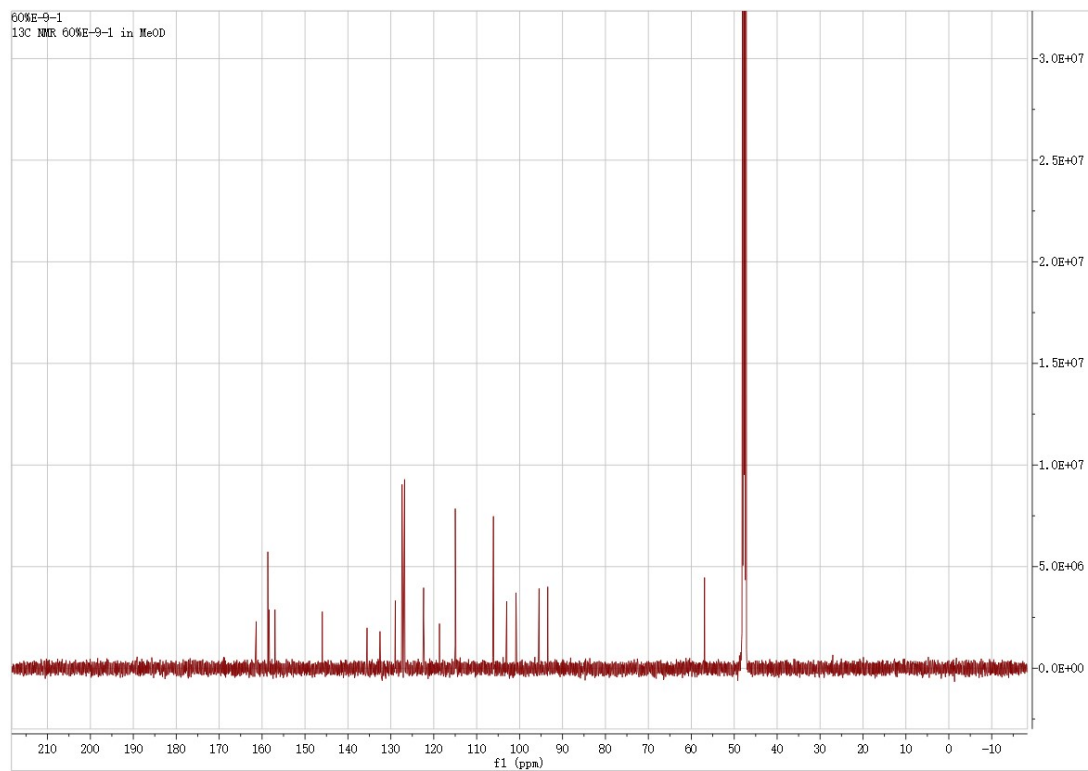

The  $^{13}\text{C}$  NMR (151 MHz, MeOD) spectrum of **5**

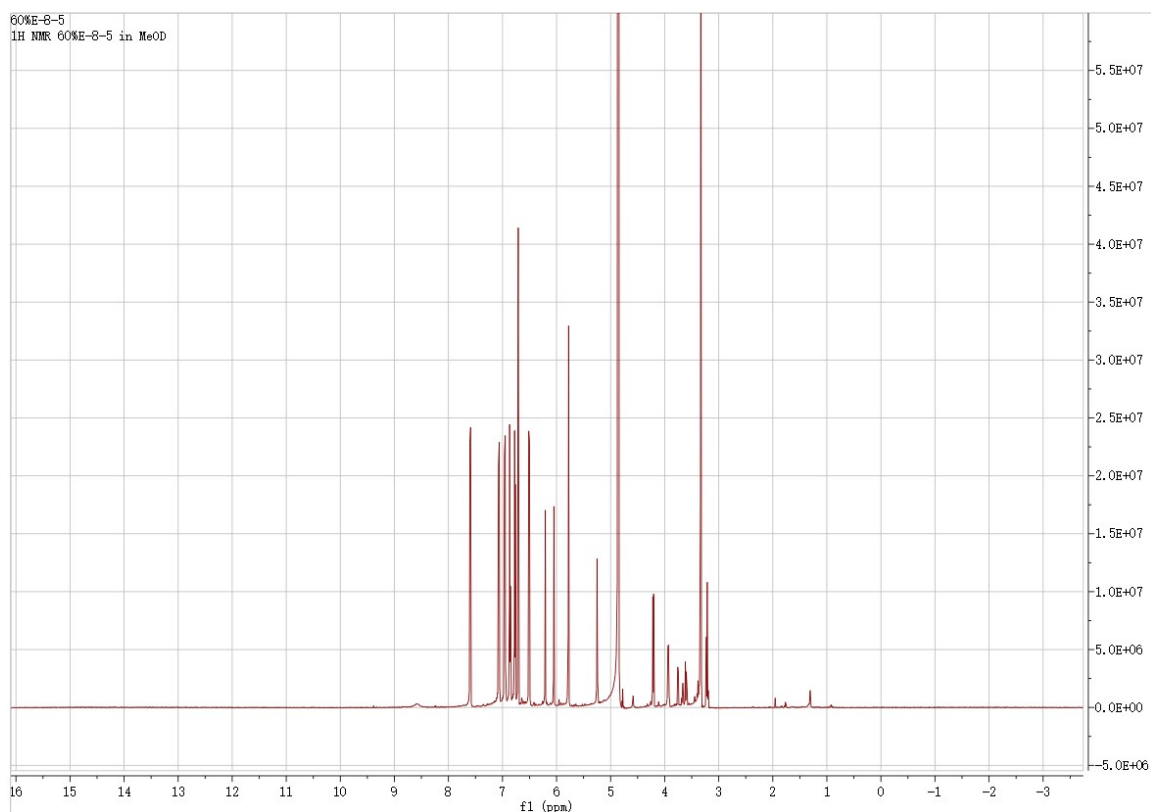

The  $^1\text{H}$  NMR (600 MHz, MeOD) spectrum of **6**

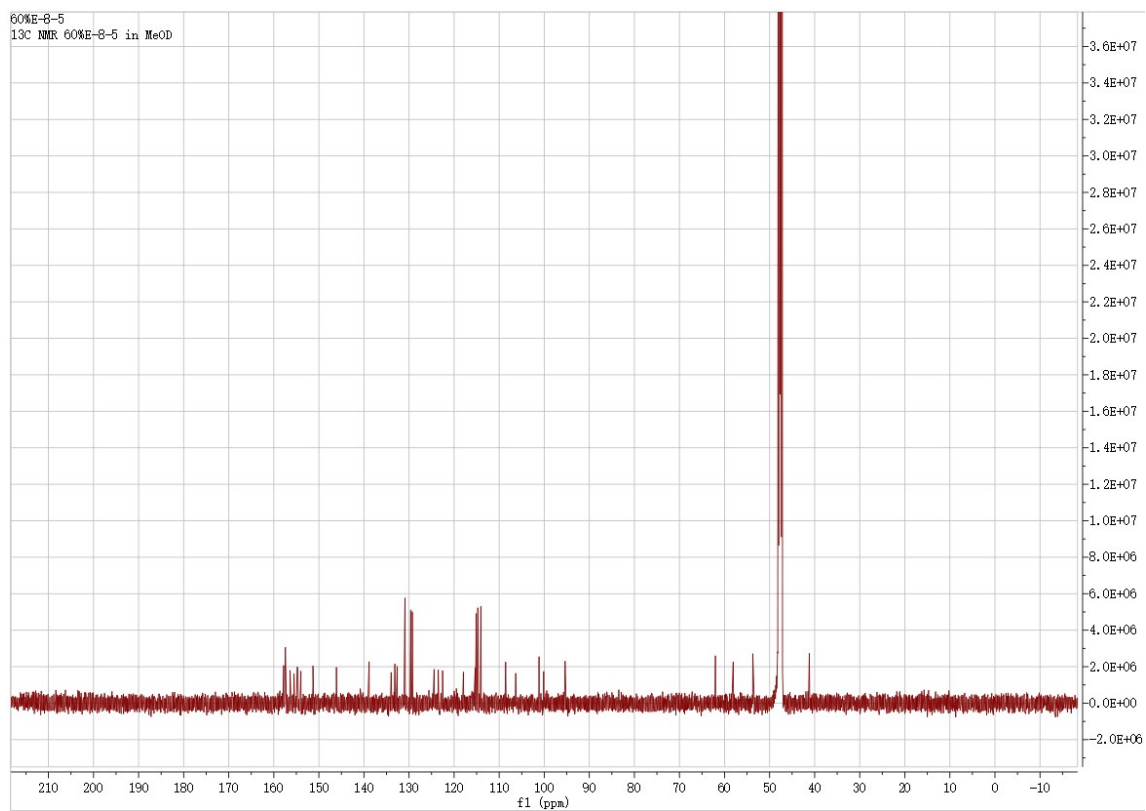

The  $^{13}\text{C}$  NMR (151 MHz, MeOD) spectrum of **6**

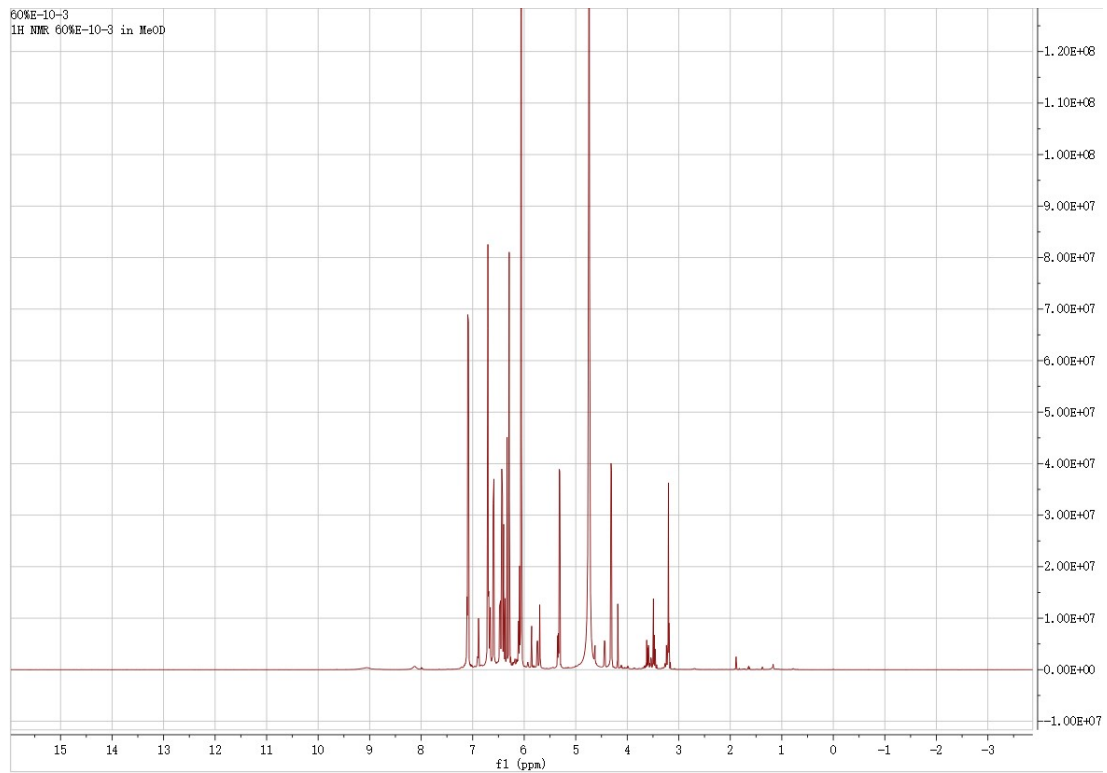

The  $^1\text{H}$  NMR (600 MHz, MeOD) spectrum of **7**

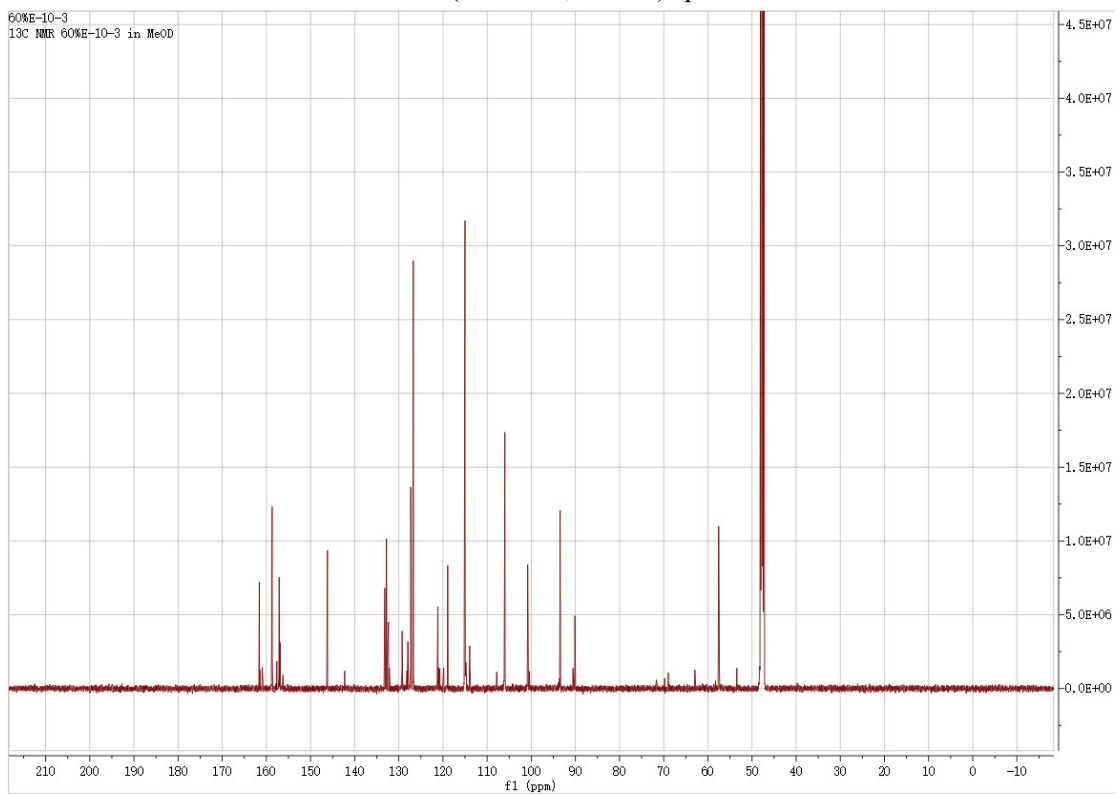

The  $^{13}\text{C}$  NMR (151 MHz, MeOD) spectrum of **7**
